# Supplementary material for: A single-institution experience with the Optilume Urethral Drug Coated Balloon for management of urethral stricture disease
Source: PubMed Central journal article supplement — Transl Androl Urol. 2024 Aug 20;13(8):1498–505. doi: 10.21037/tau-24-104 (PMC11399038; doi:10.21037/tau-24-104), 2024-08-20
Supplement: tau-13-08-1498-dss.pdf [file tau-13-08-1498-dss.pdf]

## Data Sharing Statement

|                     |                                                                                                                                                     |                                                                                                                                                                                    |
|---------------------|-----------------------------------------------------------------------------------------------------------------------------------------------------|------------------------------------------------------------------------------------------------------------------------------------------------------------------------------------|
| <b>Article Info</b> | https://dx.doi.org/10.21037/tau-24-104                                                                                                              |                                                                                                                                                                                    |
| <b>Item</b>         | <b>Question</b>                                                                                                                                     | <b>Authors' Response<br/>(place "-" if not applicable)</b>                                                                                                                         |
| 1                   | Would you like to share data collected for your study to others?                                                                                    | Yes.                                                                                                                                                                               |
| 2                   | If not, would you like to share the reason for your decision?                                                                                       | -                                                                                                                                                                                  |
| 3                   | What data in particular will be shared?                                                                                                             | The patient demographic information, stricture characteristics, operative details and postoperative outcomes including PVR, and time to repeat intervention for affected patients. |
| 4                   | Any other documents will be shared? Such as study protocol, statistical analysis plan, informed consent form, clinical study report, analytic code. | Relevant information can be shared if requested.                                                                                                                                   |
| 5                   | When will data availability begin?                                                                                                                  | From the publication date.                                                                                                                                                         |
| 6                   | When will data availability end?                                                                                                                    | Three years within the date of publication, as the application of DCB will likely be adjusted and become more widespread during this interval.                                     |
| 7                   | To whom will you share the data?                                                                                                                    | Urologists interested in further evaluating and/or implementing DCB in their clinical practices.                                                                                   |
| 8                   | For what type of analysis or purpose?                                                                                                               | For analysis of safety and analyzing treatment indications for DCB on urethral stricture disease.                                                                                  |
| 9                   | How or where can the data/documents be obtained?                                                                                                    | Emails can be sent to the address below to obtain shared data:<br>ashmahen@iu.edu                                                                                                  |
| 10                  | Any other restrictions?                                                                                                                             | We may evaluate the potential benefits and risks of each individual request prior to providing data to be shared.                                                                  |
